# Supplementary material for: γ-Carboxymuconolactone decarboxylase: a novel cell cycle-related basal body protein in the early branching eukaryote Trichomonas vaginalis
Source: PubMed Central journal article supplement (PMC5615479; doi:10.1186/s13071-017-2381-4), 2017-09-26
Supplement: 13071_2017_2381_MOESM2_ESM.pdf [file 13071_2017_2381_MOESM2_ESM.pdf]

**Additional file 2: Table S2. Primer sets used for real-time PCR**

| Oligo name           |         | Sequence                 |
|----------------------|---------|--------------------------|
| TvCMD1 (TVAG_256720) | Forward | GAGTTACAAAGCGACGGA       |
|                      | Reverse | TCCAAAGACATTTCTAAAATGATT |
| TvCMD2 (TVAG_107080) | Forward | TTAGGTCATGGAAAATGGGA     |
|                      | Reverse | CATTCCCTTAGCAAATTTCA     |
| TvCMD3 (TVAG_474690) | Forward | CTATTTTAATAGGATCAAGAT    |
|                      | Reverse | TTCTTTTCTATTTTCTTTTGT    |
