# Supplementary material for: γ-Carboxymuconolactone decarboxylase: a novel cell cycle-related basal body protein in the early branching eukaryote Trichomonas vaginalis
Source: PubMed Central journal article supplement (PMC5615479; doi:10.1186/s13071-017-2381-4), 2017-09-26
Supplement: 13071_2017_2381_MOESM3_ESM.pdf [file 13071_2017_2381_MOESM3_ESM.pdf]

**Additional file 3: Figure S1. Sequence alignment of dualCMDs in *T. vaginalis*.**

**a**

```

TvCMD1  MS-YKATEHDI EQNDPEYTAFFKRFELMVKNESKIDDKSRYLGILGALIGAKAIDYFPIILEMSLDNILTPNEVKEVLYEAAAYILGIANVFPFLKLTNDIFKAKNINLPLENQSKVAPGE
TvCMD2  MSNYKEVLDELEHNDPEYFEFFYRFEKLVQSETKIDEKNRYLGILGSLIGSKSIDYYPYII EQVLTKILTPOEIKEVLYEAAAYILGASTVYFPFLKVTNDIFKQHNINLPLENQCKVSPEE
TvCMD3  MS-NSLPSIDPRIPDAEFLNVFNEFENDVKNEIKVENEYRIPAILAILIGRSRIDYFPTFLDEAVSSGITITQIKEII YQGIMLIGMAHVYFPFLKIVNEHF---NISEPADHHSTVTKEN
** . : . *.*: .* .** *:.* *::: * .**.*:::***:* :: : . :* ::*:**.. **: *:*:***:.*: * **.* * :...*: :

TvCMD1  GLQKGIEKQAEAFPGMEKPFHTMGPMKWWVVSFMYGEFYTREVLTVKERELVLSCIFIGHGDAAPQFNQHIKANIHVGNKKFLIQMILSLVPYLYGYPRTFNALKVLND---AIPDE---
TvCMD2  ALKKGIEKQKESFGPGMEDFHTKGPMMKWVVTFMYGQLYTRVLTVKQREIVITCIFIYGDATPQFLQHVKALTNLGHGKWDLIQMILSLVPYIYGYPRTFNALRAINE---AVPDPLYM
TvCMD3  RKEKGIEKLNESFGFIMNGLPGLGPMSDWLMKYYGELYTRDILSMRQRELILLCFLSVHGDSYMALSAHVMSNINVGNDKEFLKNVYSLVPYMGSVKAYNAIKCIDDDWKSVPVHSD---
:***** *:* * : : *** .*:::: **::*:***:***:***:***: ** : *** : * : : **:* * : : ***** * :***:***: : : : . : .

TvCMD1  -----
TvCMD2  KVMKFAKGMYSIFG
TvCMD3  -----

```

**b**

|                                                                                          |                                                                                                                                                                                                                                                                  |                                                                                             |                                                                                                                                                                                                                                                                      |
|------------------------------------------------------------------------------------------|------------------------------------------------------------------------------------------------------------------------------------------------------------------------------------------------------------------------------------------------------------------|---------------------------------------------------------------------------------------------|----------------------------------------------------------------------------------------------------------------------------------------------------------------------------------------------------------------------------------------------------------------------|
| <p>TvCMD_1-110<br/>Q88N35_P.putida<br/>Q8TJP3_M.acetivorans<br/>Q5ZYG6_L.pneumophila</p> | <p>MSYKATE-----HDIEQN---DPEYTAFFKR-FE<br/>MDEKQRYDAGMQRRAVLGDAHVDRLS-EKLNDF---NGEFQEMITRHAW<br/>MTEHEEILESMGEK-----GFTPQVL-ETLGDLD---DPEFLHKYRR-CD<br/>MSDKFSH-----ITKDITTLAKFRKEMPELMTGFSS-LA<br/>* : : : *</p>                                                 | <p>TvCMD1_111-233<br/>Q88N35_P.putida<br/>Q8TJP3_M.acetivorans<br/>Q5ZYG6_L.pneumophila</p> | <p>NQSKVAPGEGLQKGIEKQAEAFG-PGM-EKFHTM-GPMKWWVVSF---MYG<br/>MDEKQRYDAGMQRRAVLGDAHVDRLS-EKLNDFNGEFQEMITRH---AWG<br/>MTEHEEILESMGEK-----MGFTPQVL-ETLGDLDPEFL---HKYRRCDH<br/>MSDKFSH-----ITKDITTLAKFRKEMPELMTGFSSLAQ<br/>. : : : *</p>                                   |
| <p>TvCMD_1-110<br/>Q88N35_P.putida<br/>Q8TJP3_M.acetivorans<br/>Q5ZYG6_L.pneumophila</p> | <p>LMVKNESKIDDKSRYLGILGALIGAKAIDYFPIILEMSLDNILTPNEVKE<br/>GDIWTRPGLPRHTRSLITIAMLIGMNRNDELKHLRAAANNGVTRDEIKE<br/>HKILTDGALPSKVKILMALAVVASKQCESCTVAQMKSALKNGATKEEIME<br/>QAATKDGDALDKKTKELIAMALAVAKQCPGCIGFHSQTLVKLQATREELLE<br/>. : : : * : . . . . * : * : *</p> | <p>TvCMD1_111-233<br/>Q88N35_P.putida<br/>Q8TJP3_M.acetivorans<br/>Q5ZYG6_L.pneumophila</p> | <p>EFYTREVLTVKERELVLSCIFIGHGDAAPQFNQHIKANIHVGNKKFLIQ<br/>DIWTRPGLPRHTRSLITIAMLIGMNRNDELKHLRAAANNGVTRDEIKE<br/>KILTDGALPSKVKILMALAVVASKQ-CESCTVAQMKSALKNGATKEEIME<br/>AATKDGDALDKKTKELIAMALAVAKQ-CPGCIGFHSQTLVKLQATREELLE<br/>. * : : * : . : . : : : : . : . : .</p> |
| <p>TvCMD_1-110<br/>Q88N35_P.putida<br/>Q8TJP3_M.acetivorans<br/>Q5ZYG6_L.pneumophila</p> | <p>VLYEAAAYILGIANVFPFLKLTNDIFKAKNINLPLE<br/>VLMQSAIYCGIPAAANATPHLAESVWDELGVESR-Q<br/>TMEVIFITSGAPAVAACRNALKM-LKD--M-----<br/>TLGMAVYMGGGPSLMYAAEALEA-FEFSK-----<br/>. : * . . : .</p>                                                                            | <p>TvCMD1_111-233<br/>Q88N35_P.putida<br/>Q8TJP3_M.acetivorans<br/>Q5ZYG6_L.pneumophila</p> | <p>MILSLVPYLYGYPRTFNALKVLNDAIPD-----E<br/>VLMQSAIYCGIPAA-NATPHLAESVWDELGVESRQ<br/>TMEVIFITSGAPAV-AACRNALKMLKDM-----<br/>TLGMAVYMGGGPSL-MYAAEALEAFEEF-SK----<br/>: * * . . :</p>                                                                                      |

**a** Protein sequence alignment of TvCMD1 (TVAG\_256720), 2 (TVAG\_107080) and 3 (TVAG\_474690). Gray color indicates conserved CMD signatures in sequences. **b** CMD signature alignments against three bacterial CMDs. TvCMD1 was divided into 2 CMD signatures and aligned with the CMD of *Pseudomonas putida* (Q88N35), *Methanosarcina acetivorans* (Q8TJP3 or MA3736) and *Legionella pneumophila* (Q5ZYG6 or lpg0406). The blue box indicates the conserved thioredoxin-like domain (CXXC). The brown boxes indicate cysteine residues responsible for iron-sulfur cluster binding. Asterisks (\*) indicates a fully conserved residue at the position; colon (:) indicates a residue with strong similarity; period (.) indicates a residue with weak similarity.
