# Supplementary material for: γ-Carboxymuconolactone decarboxylase: a novel cell cycle-related basal body protein in the early branching eukaryote Trichomonas vaginalis
Source: PubMed Central journal article supplement (PMC5615479; doi:10.1186/s13071-017-2381-4), 2017-09-26
Supplement: 13071_2017_2381_MOESM5_ESM.pdf [file 13071_2017_2381_MOESM5_ESM.pdf]

**Additional file 5: Figure S3. Cloning, expression of recombinant TvCMD1 and antibody assessment.**

**a**

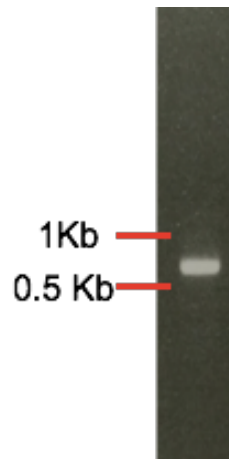

**b**

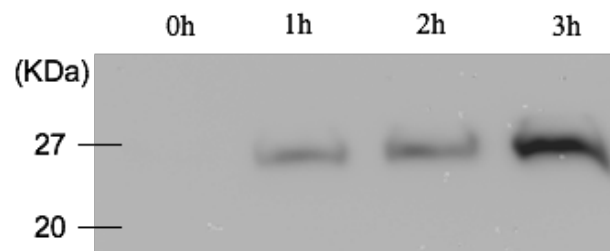

**c**

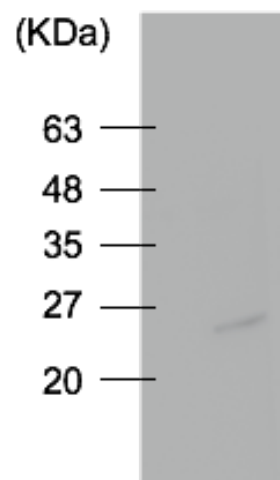

**a** TvCMD1 coding sequence was cloned into a pTrcHis-TOPO vector. **b** The expression of recombinant TvCMD1 (rTvCMD1) protein in *E. coli* was induced by IPTG treatment.

**c** The rabbit anti-TvCMD1 antibody against the native TvCMD1 protein.
